# Supplementary material for: Efficacy of Natural Deep Eutectic Solvents for Extraction of Hydrophilic and Lipophilic Compounds from Fucus vesiculosus
Source: MDPI journal article supplement (doi:10.3390/molecules26144198), 2021-07-10
Supplement: s1 [file s1]

**Efficacy of Natural Deep Eutectic Solvents for Extraction of Hydrophilic and Lipophilic compounds from *Fucus vesiculosus***

**Ekaterina D. Obluchinskaya<sup>1</sup>, Olga N. Pozharitskaya<sup>1</sup>, Lyubov V. Zakharova<sup>1</sup>, Anna V. Daurtseva<sup>1</sup>, Elena V. Flisyuk<sup>2</sup> and Alexander N. Shikov<sup>1,2\*</sup>**

<sup>1</sup> Murmansk Marine Biological Institute of the Russian Academy of Sciences (MMBI RAS), Vladimirskaia, 17, 183010 Murmansk, Russia

<sup>2</sup> Department of Technology of Pharmaceutical Formulations, St. Petersburg State Chemical Pharmaceutical University, Prof. Popov, 14, 197376, Saint-Petersburg, Russia

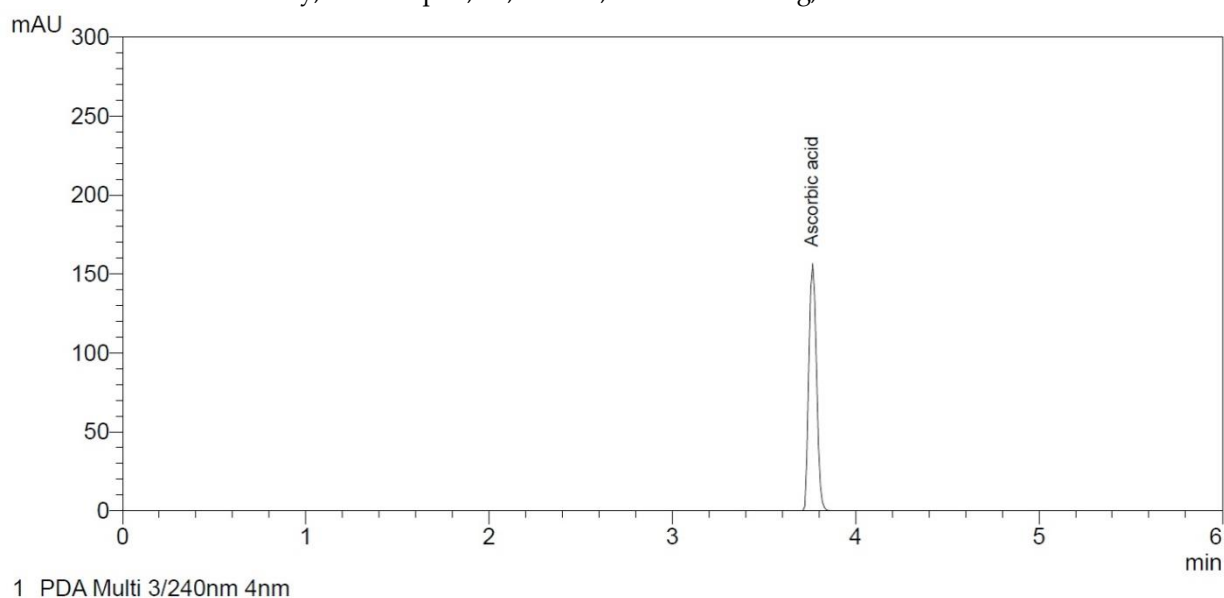

Figure S1. Typical chromatogram of ascorbic acid (reference)

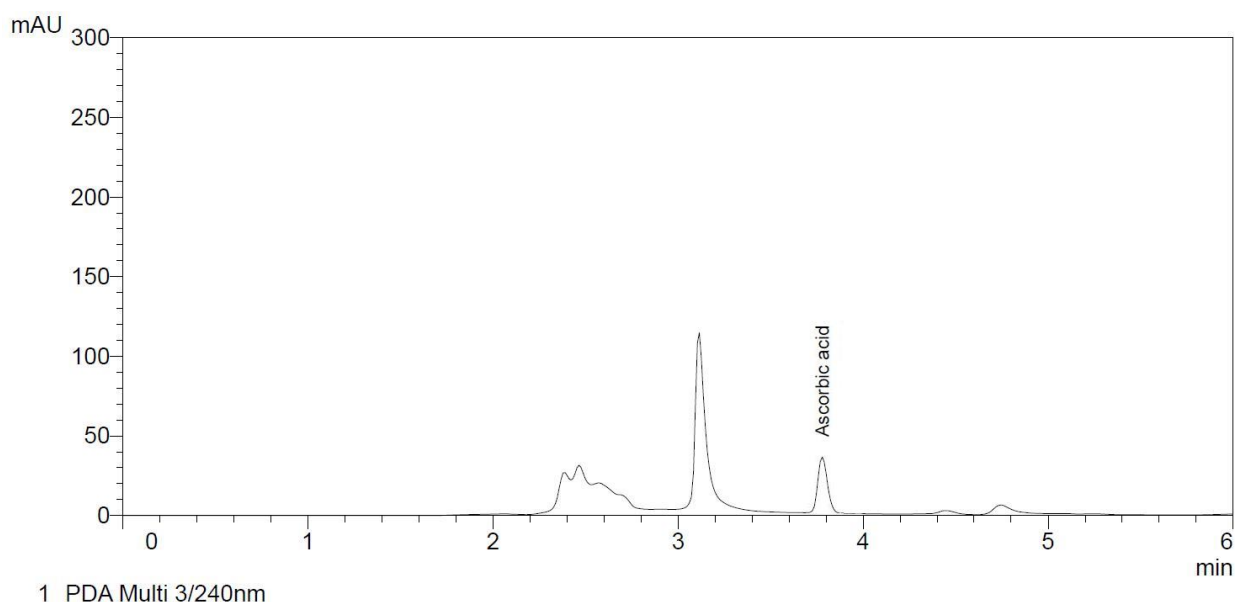

Figure S2. Typical chromatogram of *Fucus vesiculosus* extract obtained with NADES1 (conventional extraction)

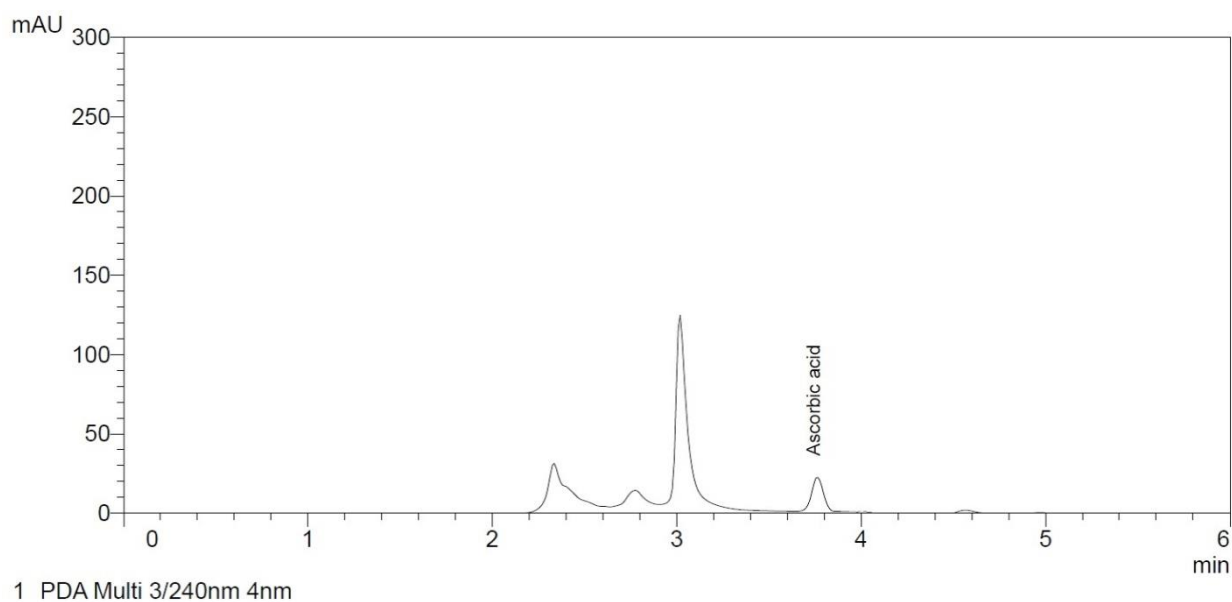

Figure S3. Typical chromatogram of *Fucus vesiculosus* extract obtained with NADES1 (ultrasound assisted extraction)

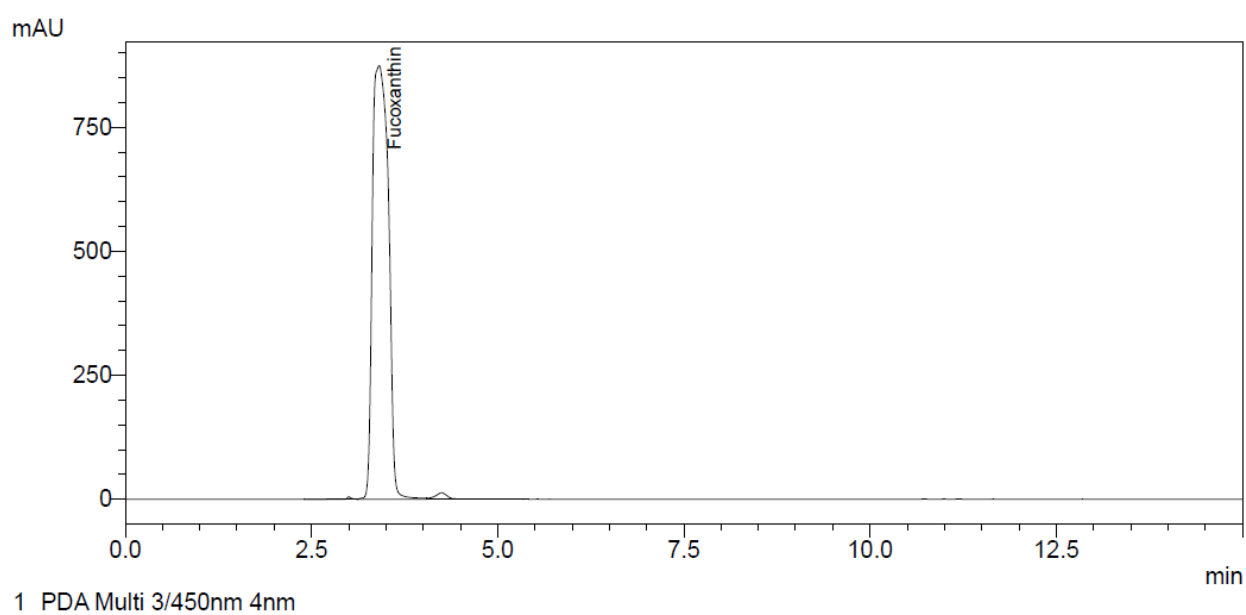

Figure S4. Typical chromatogram of fucoxanthin (reference)

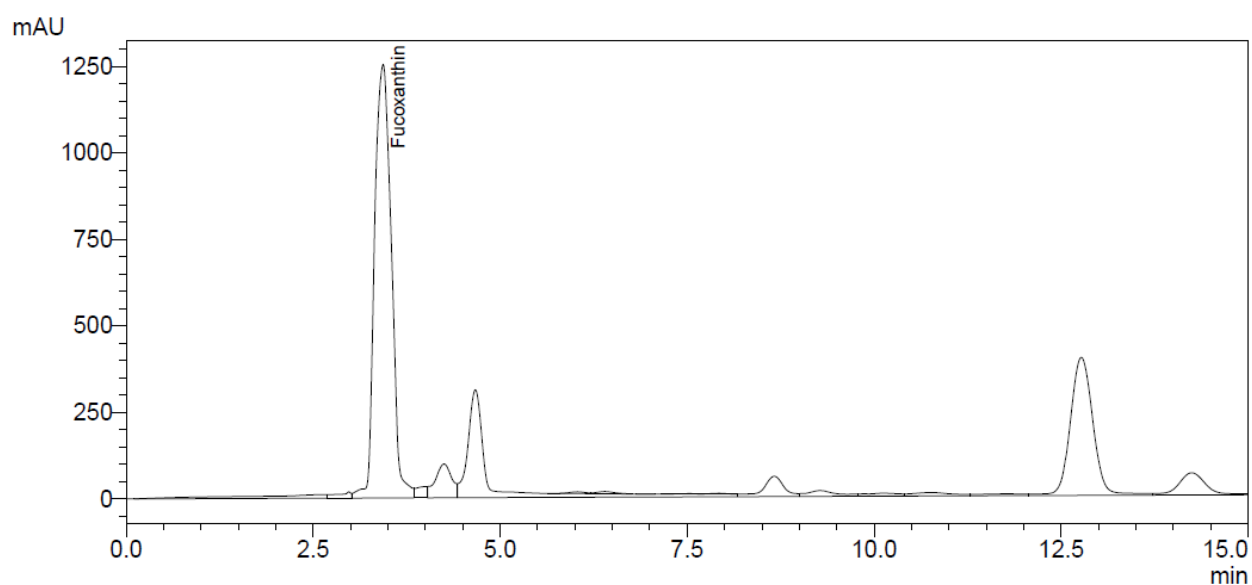

Figure S5. Typical chromatogram of *Fucus vesiculosus* extract obtained with EtOH (percolation)

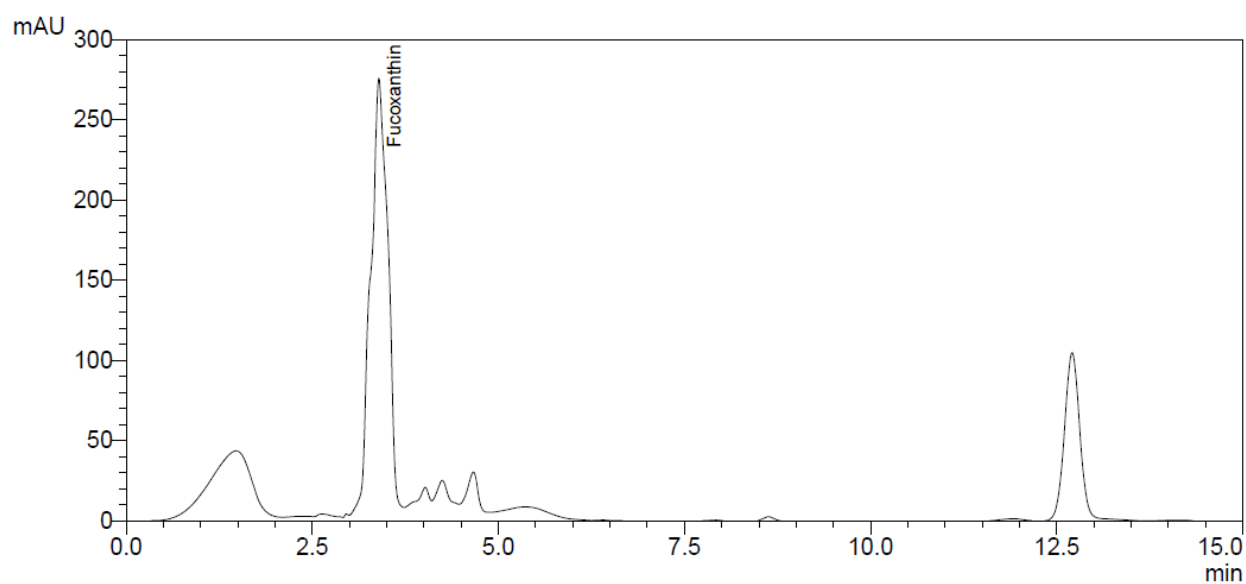

Figure S6. Typical chromatogram of *Fucus vesiculosus* extract obtained with NADES1 (ultrasound assisted extraction)

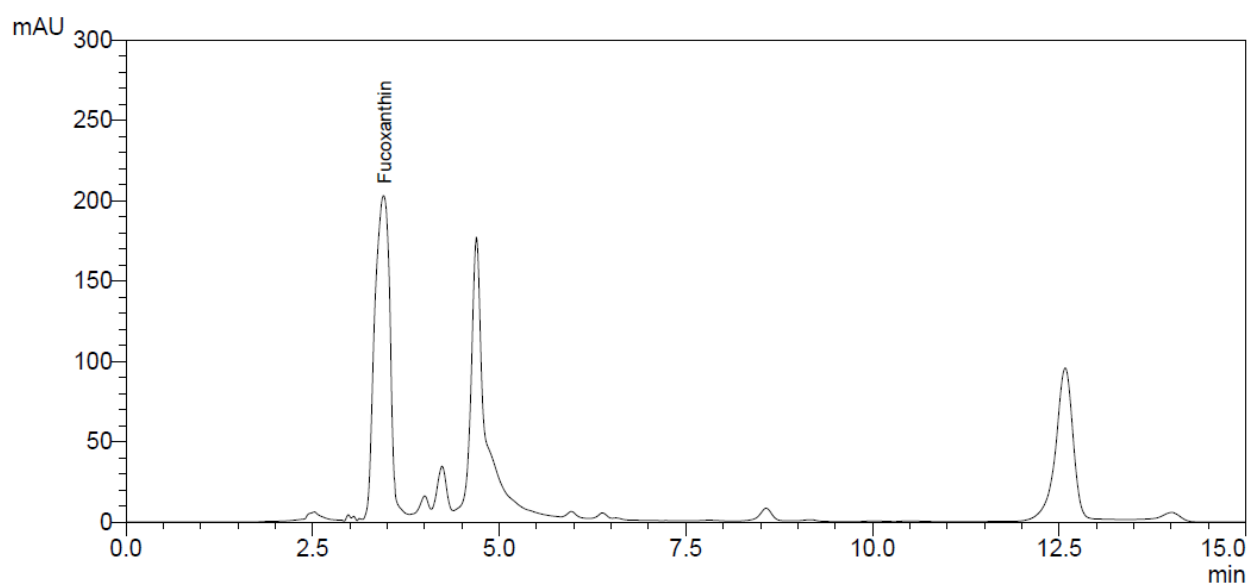

1 PDA Multi 3/450nm 4nm

Figure S7. Typical chromatogram of *Fucus vesiculosus* extract obtained with NADES2 (ultrasound assisted extraction)
